# Supplementary material for: Hypothalamic-Pituitary-Ovarian Axis Disorders Impacting Female Fertility
Source: PubMed Central journal article supplement (PMC6466056; doi:10.3390/biomedicines7010005), 2019-01-04
Supplement: biomedicines-07-00005-s001.pdf [file biomedicines-07-00005-s001.pdf]

| WHO Classification                                   | Disorders                                             | Etiology                                                                                                                                                                                                                                                                                                                                                                                  |                                                                                                                                                                                                                       | Work-up                                                                                                                                                                          | Management                                                                                                                                                                                                                                                                                                  |
|------------------------------------------------------|-------------------------------------------------------|-------------------------------------------------------------------------------------------------------------------------------------------------------------------------------------------------------------------------------------------------------------------------------------------------------------------------------------------------------------------------------------------|-----------------------------------------------------------------------------------------------------------------------------------------------------------------------------------------------------------------------|----------------------------------------------------------------------------------------------------------------------------------------------------------------------------------|-------------------------------------------------------------------------------------------------------------------------------------------------------------------------------------------------------------------------------------------------------------------------------------------------------------|
|                                                      |                                                       | Normosomic                                                                                                                                                                                                                                                                                                                                                                                | Kallmann                                                                                                                                                                                                              |                                                                                                                                                                                  |                                                                                                                                                                                                                                                                                                             |
| Group I: Hypogonadotropic Hypogonadal Anovulation    | <b>Idiopathic hypogonadotropic hypogonadism (IHH)</b> | Mutations of GNRHR, ANOS1, FGFR3/FGFR1, TACR3, CCDC141, NELF <sup>2</sup>                                                                                                                                                                                                                                                                                                                 | Interrupted GnRH neuron migration from nasal placode; FGFR1, ANOS1 (KAL1), FGFR3, FGFR1, IL17RD, DUSP6, SPRY4, FLRT3, KLB, PROK2, PROKR2, HES6ST1, CHD7, WDR11, SEMA3A, SEMA3E, IGSF10, SMCHD1, CCDC141, FEZF1, HESX1 | - Brain MRI<br>- FSH, LH                                                                                                                                                         | - Transdermal estradiol patch; gradually increase dose<br>- Conjugated equine estrogen with Cyclic medroxyprogesterone 10mg 12-14 days/month<br>- combined oral contraceptive pill<br>- Fertility treatment: recombinant FSH, human menopausal gonadotropin                                                 |
|                                                      | <b>Septo-Opto Dysplasia</b>                           | - Vascular insult in 6th-7th week of embryogenesis<br>- HESX1 mutation<br>- Associated risk factors:<br>- 1 <sup>st</sup> trimester bleeding<br>- Illicit drug use<br>- Primiparity                                                                                                                                                                                                       |                                                                                                                                                                                                                       | - Brain MRI<br>- FSH, LH                                                                                                                                                         | - Neurodevelopmental monitoring<br>- Combined oral contraceptive pill<br>- Estradiol patch or oral conjugated equine estradiol with cyclic medroxyprogesterone                                                                                                                                              |
|                                                      | <b>Panhypopituitarism</b>                             | - Pituitary tumors<br>- Traumatic brain injury<br>- Inflammatory changes ((Mycobacterium Tuberculosis, histoplasmosis, syphilis, viruses, protozoa, lymphocytic hypophysitis)<br>- Infiltrative disease (Histiocytosis, hemochromatosis, sarcoidosis)<br>- Pituitary apoplexy, Sheehan's syndrome<br>- Congenital (genetic mutation of HESX1, PROP1, and Pit-1)<br>- Empty Sella Syndrome |                                                                                                                                                                                                                       | - Brain MRI<br>- FSH, LH<br>- TSH, ACTH                                                                                                                                          | - Combined oral contraceptive pill<br>- Estradiol patch or oral conjugated equine estradiol with cyclic medroxyprogesterone<br>- Correct other endocrinopathies<br>- Fertility treatment: recombinant FSH, human or menopausal gonadotropin                                                                 |
|                                                      | <b>Craniopharyngioma</b>                              | - Embryonic theory: arises from remnants of Rathke's pouch<br>- Metaplastic theory: metaplasia of squamous epithelial cell rests from stomodaeum<br>- Mutations in CTNNB1 that encodes $\beta$ -catenin                                                                                                                                                                                   |                                                                                                                                                                                                                       | - Brain MRI<br>- FSH, LH                                                                                                                                                         | - Radiotherapy or subtotal resection<br>- Fertility treatment: recombinant FSH, human menopausal gonadotropin                                                                                                                                                                                               |
|                                                      | <b>Langerhans Histiocytosis X</b>                     | - Somatic mutations gain of function in BRAF gene in 50% of cases                                                                                                                                                                                                                                                                                                                         |                                                                                                                                                                                                                       | - Brain MRI<br>- FSH, LH<br>- Prolactin, TSH, ACTH<br>- Basic metabolic profile                                                                                                  | - Radiotherapy<br>- Correct endocrinopathy<br>- Fertility treatment: human menopausal gonadotropin (hMG)                                                                                                                                                                                                    |
| Group II: Irregularities in HPO Axis                 | <b>Polycystic Ovarian Syndrome</b>                    | - Multifactorial<br>- Candidate genes mutated: GLUT4, miR-93                                                                                                                                                                                                                                                                                                                              |                                                                                                                                                                                                                       | - Total testosterone<br>- 17-hydroxyprogesterone<br>- Dehydroepiandrosterone-dione sulfate<br>- 2-hour glucose tolerance test<br>- Lipid panel<br>- Transvaginal ultrasonography | - Combined oral contraceptive pill<br>- Fertility treatment: First line- letrozole Second line- clomiphene citrate                                                                                                                                                                                          |
|                                                      | <b>Hyperprolactinemia</b>                             | - Prolactinoma<br>- Primary hypothyroidism<br>- Autoimmune disorders<br>- Chronic renal failure<br>- Psychotropic medications                                                                                                                                                                                                                                                             |                                                                                                                                                                                                                       | - Prolactin<br>- TSH<br>- MRI of the pituitary fossa                                                                                                                             | - Cabergoline<br>- Bromocriptine<br>- Surgical decompression if medical management fails                                                                                                                                                                                                                    |
|                                                      | <b>Thyroid dysfunction</b>                            | <b>Hyperthyroidism</b><br>- Hashimoto's thyroiditis<br>- Lymphocytic thyroiditis<br>- Radiation therapy<br>- Surgery<br>- De Quervain<br>- Infiltrative sarcoidosis<br>- Hemochromatosis<br>- Drugs (Lithium, Amiodarone)                                                                                                                                                                 | <b>Hypothyroidism</b><br>- Graves disease<br>- Iatrogenic (drug induced, TKI, INF $\alpha$ )<br>- Inadequate iodine<br>- Struma ovarii<br>- Infection                                                                 | - TSH<br>- Total and free T4<br>- Consider total and free T3                                                                                                                     | - Levothyroxine if hypothyroid<br>- Methimazole or propylthiouracil if hyperthyroid                                                                                                                                                                                                                         |
|                                                      | <b>Endometriosis</b>                                  | - Multifactorial<br>- miR-135a overexpression<br>- Copy number variants: 1p36, 7p22.1 and 22q12                                                                                                                                                                                                                                                                                           |                                                                                                                                                                                                                       | - Diagnostic laparoscopy                                                                                                                                                         | - Surgical ablation of lesions<br>- Ovulation induction agents                                                                                                                                                                                                                                              |
| Group III: Hypergonadotropic Hypogonadal Anovulation | <b>Primary Ovarian Insufficiency</b>                  | - Genetic (Turner's, Fragile X)<br>- Acquired (autoimmune, environmental)<br>- Iatrogenic (chemotherapy agents, drugs, brain radiation)                                                                                                                                                                                                                                                   |                                                                                                                                                                                                                       | - AMH<br>- Karyotype<br>- FMR1 pre-mutation                                                                                                                                      | - Combined oral contraceptive pill<br>- Estradiol patch or oral conjugated equine estradiol with cyclic medroxyprogesterone<br>Fertility treatment:<br>- Oocyte or ovarian tissue* cryopreservation<br>- IVF with donor oocytes<br>- Stem cell therapy*<br>- AUGMENT*<br><br>*still considered experimental |

Table S1. Summary of group I-III ovulation disorders including etiology, evaluation and management.
